# Supplementary material for: Theoretical treatment of IO–X (X = N2, CO, CO2, H2O) complexes
Source: Royal Society of Chemistry journal article supplement (doi:10.1039/d1cp05536d), 2022-01-01
Supplement: d1cp05536d1.pdf [file d1cp05536d1.pdf]

## **Supplementary Material**

### **Theoretical Treatment of IO-X (X = N<sub>2</sub>, CO, CO<sub>2</sub>, H<sub>2</sub>O) complexes**

**S. Marzouk, Y. Ajili, M. Ben El Hadj Rhouma, R. Ben Said, and M. Hochlaf**

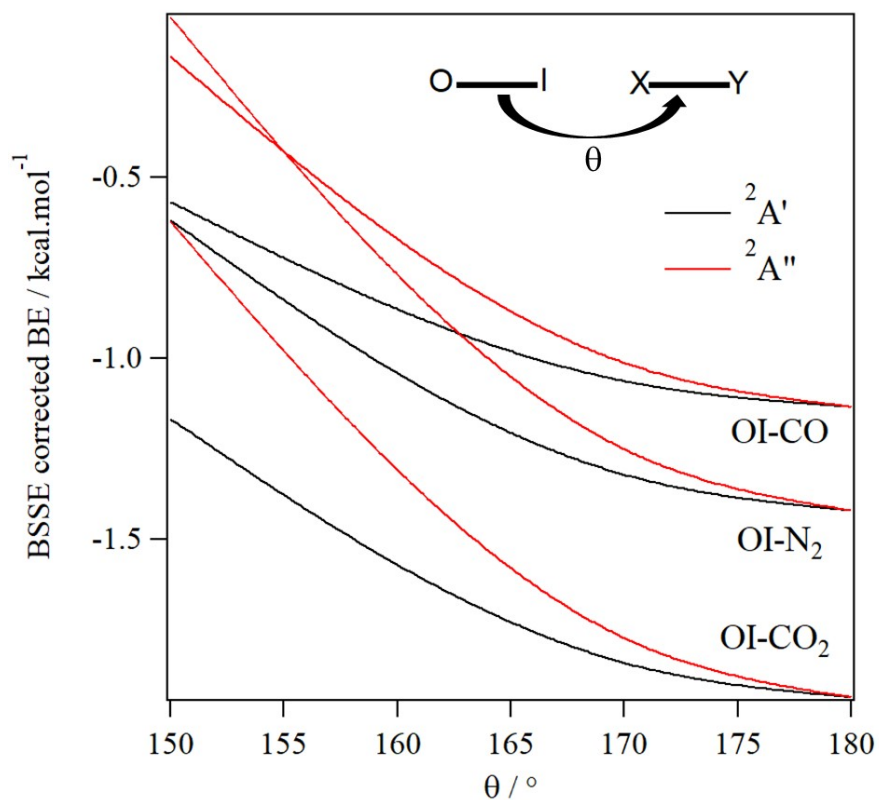

**Figure S1:** RCCSD(T)/aug-cc-pVTZ(PP) one-dimensional cuts of the potential energy surfaces of the OI-XY (XY = CO, N<sub>2</sub> and CO<sub>2</sub>) complexes along the  $\theta$  angle as defined in this figure. At linearity all complexes have a  ${}^2\Pi$  symmetry. The reference energy is that of the separated monomers.

**Table S1:** Optimized equilibrium geometric parameters ( $R_i$  in Å and  $\theta_i$  degree) of the I-bonded complexes between IO and  $N_2$ , CO,  $CO_2$  or  $H_2O$  as computed using PBE0(+D3) and M05-2X(+D3) DFTs in conjunction with the aug-cc-pVTZ(PP) basis set.

|                          | PBE0  | PBE0-D3 | M05-2X | M05-2X-D3 |                          | PBE0  | PBE0-D3 | M05-2X | M05-2X-D3 |
|--------------------------|-------|---------|--------|-----------|--------------------------|-------|---------|--------|-----------|
| <b>OI-N<sub>2</sub></b>  |       |         |        |           | <b>OI-CO</b>             |       |         |        |           |
| R <sub>1</sub>           | 1.879 | 1.880   | 1.903  | 1.903     | R <sub>1</sub>           | 1.125 | 1.125   | 1.122  | 1.122     |
| R <sub>2</sub>           | 3.326 | 3.326   | 3.173  | 3.229     | R <sub>2</sub>           | 3.349 | 3.348   | 3.388  | 3.383     |
| R <sub>3</sub>           | 1.089 | 1.089   | 1.083  | 1.083     | R <sub>3</sub>           | 1.878 | 1.879   | 1.902  | 1.902     |
| $\theta_1$               | 180.0 | 180.0   | 179.7  | 179.9     | $\theta_1$               | 180.0 | 180.0   | 179.9  | 179.9     |
| <b>OI-CO<sub>2</sub></b> |       |         |        |           | <b>OI-H<sub>2</sub>O</b> |       |         |        |           |
| R <sub>1</sub>           | 1.157 | 1.157   | 1.154  | 1.154     | R <sub>1</sub>           | - a)  | - a)    | 2.804  | 2.796     |
| R <sub>2</sub>           | 3.234 | 3.239   | 3.100  | 3.102     | R <sub>2</sub>           | - a)  | - a)    | 0.958  | 0.958     |
| R <sub>3</sub>           | 1.879 | 1.879   | 1.903  | 1.903     | R <sub>3</sub>           | - a)  | - a)    | 1.909  | 1.910     |
| $\theta_1$               | 180.0 | 180.0   | 180.0  | 180.0     | $\theta_1$               | - a)  | - a)    | 126.5  | 126.4     |
| $\theta_2$               | 179.5 | 179.5   | 187.8  | 188.0     | $\theta_2$               | - a)  | - a)    | 180.0  | 180.0     |
| $\theta_3$               | 180.0 | 179.9   | 180.0  | 180.0     |                          |       |         |        |           |

a) No convergence.

**Table S2:** Optimized equilibrium geometric parameters ( $R_i$  in Å and  $\theta_i$  degree) of the O-bonded complexes between IO and  $N_2$ , CO,  $CO_2$  or  $H_2O$  as computed using PBE0(+D3) and M05-2X(+D3) DFTs in conjunction with the aug-cc-pVTZ(PP) basis set.

|                          | PBE0  | PBE0-D3 | M05-2X | M05-2X-D3 |                          | PBE0  | PBE0-D3 | M05-2X | M05-2X-D3 |
|--------------------------|-------|---------|--------|-----------|--------------------------|-------|---------|--------|-----------|
| <b>IO-N<sub>2</sub></b>  |       |         |        |           | <b>IO-CO</b>             |       |         |        |           |
| R <sub>1</sub>           | 1.878 | 1.877   | 1.899  | 1.899     | R <sub>1</sub>           | 1.877 | 1.877   | 1.904  | 1.904     |
| R <sub>2</sub>           | 3.483 | 3.287   | 3.322  | 3.167     | R <sub>2</sub>           | 3.207 | 3.116   | 3.087  | 3.030     |
| R <sub>3</sub>           | 1.090 | 1.090   | 1.084  | 1.084     | R <sub>3</sub>           | 1.124 | 1.1243  | 1.120  | 1.120     |
| $\theta_1$               | 100.0 | 94.4    | 87.4   | 91.1      | $\theta_1$               | 101.3 | 99.1    | 108.1  | 105.8     |
| $\theta_2$               | 95.9  | 100.0   | 88.6   | 88.2      | $\theta_2$               | 101.8 | 101.9   | 97.4   | 97.8      |
| <b>IO-CO<sub>2</sub></b> |       |         |        |           | <b>IO-H<sub>2</sub>O</b> |       |         |        |           |
| R <sub>1</sub>           | 2.968 | 2.909   | 2.797  | 2.802     | R <sub>1</sub>           | 0.962 | 0.962   | 0.960  | 0.960     |
| R <sub>2</sub>           | 1.158 | 1.158   | 1.155  | 1.155     | R <sub>2</sub>           | 1.970 | 1.958   | 2.030  | 2.022     |
| R <sub>3</sub>           | 1.876 | 1.876   | 1.896  | 1.896     | R <sub>3</sub>           | 1.874 | 1.875   | 1.8930 | 1.893     |
| $\theta_1$               | 90.7  | 90.7    | 90.8   | 90.7      | $\theta_1$               | 105.1 | 105.0   | 105.5  | 105.4     |
| $\theta_2$               | 119.8 | 116.0   | 115.6  | 113.8     | $\theta_2$               | 167.7 | 166.1   | 170.5  | 172.3     |
|                          |       |         |        |           | $\theta_3$               | 111.4 | 107.5   | 106.4  | 103.6     |

**Table S3:** Non-vanishing spin-orbit integrals (SO, cm<sup>-1</sup>) in Cartesian coordinates of OI-CO(X<sup>2</sup>Π), OI-N<sub>2</sub>(X<sup>2</sup>Π), OI-H<sub>2</sub>O and IO-H<sub>2</sub>O complexes at equilibrium.

| Complex                              | Integral                                     | SO                  |
|--------------------------------------|----------------------------------------------|---------------------|
| OI-CO (X <sup>2</sup> Π)             | $i\langle X^2\Pi   L_z S_z   X^2\Pi \rangle$ | -33.4 <sup>a)</sup> |
| OI-N <sub>2</sub> (X <sup>2</sup> Π) | $i\langle X^2\Pi   L_z S_z   X^2\Pi \rangle$ | -7.4 <sup>a)</sup>  |
| IO-N <sub>2</sub>                    | $i\langle 1^2A''   L_x S_x   1^2A'' \rangle$ | -0.1 <sup>a)</sup>  |
|                                      | $\langle 1^2A'   L_y S_y   1^2A'' \rangle$   | 6.6 <sup>a)</sup>   |
|                                      | $i\langle 1^2A'   L_z S_z   1^2A'' \rangle$  | -1.75 <sup>a)</sup> |
| OI-H <sub>2</sub> O                  | $i\langle 1^2A'   L_x S_x   1^2A' \rangle$   | -49.3 <sup>b)</sup> |
|                                      | $i\langle 1^2A''   L_x S_x   1^2A'' \rangle$ | -1.2 <sup>b)</sup>  |
|                                      | $\langle 1^2A'   L_y S_y   1^2A'' \rangle$   | 8.1 <sup>b)</sup>   |
|                                      | $i\langle 1^2A'   L_z S_z   1^2A'' \rangle$  | -47.4 <sup>b)</sup> |
| OI-H <sub>2</sub> O                  | $i\langle 1^2B_1   L_z S_z   1^2B_2 \rangle$ | -5.8 <sup>b)</sup>  |

- a) Computed at the full valence CASSCF/aug-cc-pVTZ(PP) level.  
b) Computed at the full valence CASSCF/aug-cc-pVDZ(PP) level.

**Table S4:** Vibrational frequencies ( $\nu_i$  in  $\text{cm}^{-1}$ ) of the I-bonded complexes between IO and X ( $X = \text{N}_2$ , CO,  $\text{CO}_2$ ,  $\text{H}_2\text{O}$ ) as computed using PBE0(+D3) and M05-2X(+D3) DFTs in conjunction with the aug-cc-pVTZ(PP) basis set. For sake of simplicity, the modes are numbered by increasing energy.

| Mode                     | PBE0 | PBE0-D3 | M05-2X | M05-2X-D3 | Mode                     | PBE0 | PBE0-D3 | M05-2X | M05-2X-D3 |
|--------------------------|------|---------|--------|-----------|--------------------------|------|---------|--------|-----------|
| <b>OI-N<sub>2</sub></b>  |      |         |        |           | <b>OI-CO</b>             |      |         |        |           |
| $\nu_1$                  | 32   | 30      | - a)   | - a)      | $\nu_1$                  | 24   | 23.80   | - a)   | - a)      |
| $\nu_2$                  | 32   | 31      | 23     | 17        | $\nu_2$                  | 28   | 27      | 20     | 37        |
| $\nu_3$                  | 53   | 58      | 66     | 62        | $\nu_3$                  | 50   | 55      | 22     | 37        |
| $\nu_4$                  | 84   | 79      | 102    | 93        | $\nu_4$                  | 57   | 57      | 61     | 61        |
| $\nu_5$                  | 88   | 88      | 107    | 98        | $\nu_5$                  | 65   | 65      | 115    | 134       |
| $\nu_6$                  | 691  | 691     | 650    | 648       | $\nu_6$                  | 691  | 694     | 642    | 643       |
| $\nu_7$                  | 2482 | 2483    | 2556   | 2556      | $\nu_7$                  | 2224 | 2224    | 2267   | 2268      |
| <b>OI-CO<sub>2</sub></b> |      |         |        |           | <b>OI-H<sub>2</sub>O</b> |      |         |        |           |
| $\nu_1$                  | 21   | 20      | - a)   | - a)      | $\nu_1$                  | -b)  | - b)    | 74     | 69        |
| $\nu_2$                  | 21   | 20      | 16     | 16        | $\nu_2$                  | -b)  | - b)    | 82     | 84        |
| $\nu_3$                  | 48   | 47      | 33     | 30        | $\nu_3$                  | -b)  | - b)    | 149    | 151       |
| $\nu_4$                  | 48   | 49      | 46     | 45        | $\nu_4$                  | -b)  | - b)    | 201    | 182       |
| $\nu_5$                  | 60   | 59      | 71     | 72        | $\nu_5$                  | -b)  | - b)    | 293    | 290       |
| $\nu_6$                  | 681  | 682     | 653    | 652       | $\nu_6$                  | -b)  | - b)    | 636    | 638       |
| $\nu_7$                  | 682  | 682     | 697    | 697       | $\nu_7$                  | -b)  | - b)    | 1612   | 1608      |
| $\nu_8$                  | 693  | 692     | 697    | 697       | $\nu_8$                  | -b)  | - b)    | 3860   | 3862      |
| $\nu_9$                  | 1395 | 1394    | 1410   | 1410      | $\nu_9$                  | -b)  | - b)    | 3960   | 3963      |
| $\nu_{10}$               | 2449 | 2449    | 2443   | 2443      |                          |      |         |        |           |

- a) Imaginary frequency.  
b) No convergence.

**Table S5:** Vibrational frequencies ( $\nu_i$  in  $\text{cm}^{-1}$ ) of the O-bonded complexes between IO and X ( $X = \text{N}_2$ , CO,  $\text{CO}_2$ ,  $\text{H}_2\text{O}$ ) as computed using PBE0(+D3) and M05-2X(+D3) DFTs in conjunction with the aug-cc-pVTZ(PP) basis set. For sake of simplicity, the modes are numbered by increasing energy.

| Mode                     | PBE0 | PBE0-D3 | M05-2X | M05-2X-D3 | Mode                     | PBE0 | PBE0-D3 | M05-2X | M05-2X-D3 |
|--------------------------|------|---------|--------|-----------|--------------------------|------|---------|--------|-----------|
| <b>IO-N<sub>2</sub></b>  |      |         |        |           | <b>IO-CO</b>             |      |         |        |           |
| $\nu_1$                  | 12   | 20      | 29     | 34        | $\nu_1$                  | 24   | 24      | 20     | 37        |
| $\nu_2$                  | 16   | 32      | 43     | 48        | $\nu_2$                  | 26   | 40      | 22     | 37        |
| $\nu_3$                  | 24   | 33      | 54     | 73        | $\nu_3$                  | 42   | 51      | 61     | 61        |
| $\nu_4$                  | 39   | 54      | 66     | 95        | $\nu_4$                  | 88   | 100     | 115    | 134       |
| $\nu_5$                  | 697  | 696     | 648    | 652       | $\nu_5$                  | 698  | 698     | 642    | 643       |
| $\nu_6$                  | 2480 | 2480    | 2549   | 2551      | $\nu_6$                  | 2233 | 2233    | 2267   | 2268      |
| <b>IO-CO<sub>2</sub></b> |      |         |        |           | <b>IO-H<sub>2</sub>O</b> |      |         |        |           |
| $\nu_1$                  | 16   | 24      | 41     | 52        | $\nu_1$                  | 35   | 41      | 38     | 39        |
| $\nu_2$                  | 31   | 34      | 66     | 70        | $\nu_2$                  | 158  | 165     | 157    | 161       |
| $\nu_3$                  | 59   | 71      | 88     | 93        | $\nu_3$                  | 260  | 266     | 311    | 319       |
| $\nu_4$                  | 100  | 111     | 137    | 138       | $\nu_4$                  | 299  | 303     | 329    | 323       |
| $\nu_5$                  | 673  | 671     | 642    | 645       | $\nu_5$                  | 335  | 346     | 397    | 383       |
| $\nu_6$                  | 685  | 686     | 688    | 689       | $\nu_6$                  | 708  | 707     | 625    | 624       |
| $\nu_7$                  | 702  | 701     | 704    | 705       | $\nu_7$                  | 1650 | 1653    | 1635   | 1636      |
| $\nu_8$                  | 1390 | 1390    | 1405   | 1405      | $\nu_8$                  | 3778 | 3773    | 3812   | 3812      |
| $\nu_9$                  | 2442 | 2441    | 2433   | 2432      | $\nu_9$                  | 3892 | 3888    | 3910   | 3910      |

a) Low frequency mode.
